# Supplementary material for: Lactobacillus plantarum Lp3a improves functional constipation: evidence from a human randomized clinical trial and animal model
Source: PubMed Central journal article supplement — Ann Transl Med. 2022 Mar;10(6):316. doi: 10.21037/atm-22-458 (PMC9011319; doi:10.21037/atm-22-458), 2022-03
Supplement: atm-10-06-316-dss.pdf [file atm-10-06-316-dss.pdf]

## Data Sharing Statement

|                     |                                                                                                                                                     |                                                                                                                                                                                                              |
|---------------------|-----------------------------------------------------------------------------------------------------------------------------------------------------|--------------------------------------------------------------------------------------------------------------------------------------------------------------------------------------------------------------|
| <b>Article Info</b> | <a href="https://dx.doi.org/10.21037/atm-22-458">https://dx.doi.org/10.21037/atm-22-458</a>                                                         |                                                                                                                                                                                                              |
| <b>Item</b>         | <b>Question</b>                                                                                                                                     | <b>Authors' Response<br/>(place "-" if not applicable)</b>                                                                                                                                                   |
| 1                   | Would you like to share data collected for your study to others?                                                                                    | Yes.                                                                                                                                                                                                         |
| 2                   | If not, would you like to share the reason for your decision?                                                                                       | -                                                                                                                                                                                                            |
| 3                   | What data in particular will be shared?                                                                                                             | Any data will be made available upon reasonable request.                                                                                                                                                     |
| 4                   | Any other documents will be shared? Such as study protocol, statistical analysis plan, informed consent form, clinical study report, analytic code. | The study protocol and analytical documents will be made available upon reasonable request. Informed consent forms and other documents containing identifiers will not be shared to protect patient privacy. |
| 5                   | When will data availability begin?                                                                                                                  | Data will be made available within two weeks of request made via email to the corresponding author.                                                                                                          |
| 6                   | When will data availability end?                                                                                                                    | -                                                                                                                                                                                                            |
| 7                   | To whom will you share the data?                                                                                                                    | Data/documentation will be made available to other researchers seeking access who provide a clear objective and purpose for obtaining the data.                                                              |
| 8                   | For what type of analysis or purpose?                                                                                                               | Data will be made available for secondary analysis as deemed reasonable by the study team.                                                                                                                   |
| 9                   | How or where can the data/documents be obtained?                                                                                                    | Data/documents can be obtained via email to the corresponding author.                                                                                                                                        |
| 10                  | Any other restrictions?                                                                                                                             | -                                                                                                                                                                                                            |
